# Supplementary material for: Population Differentiation and Hybridisation of Australian Snubfin (Orcaella heinsohni) and Indo-Pacific Humpback (Sousa chinensis) Dolphins in North-Western Australia
Source: PLoS One. 2014 Jul 2;9(7):e101427. doi: 10.1371/journal.pone.0101427 (PMC4079686; doi:10.1371/journal.pone.0101427)
Supplement: Table S4 — Genotype data for snubfin, humpback and hybrid dolphins. OH = snubfin dolphin, SC = humpback dolphin, CY = Cygnet Bay, DA = Dampier Archipelago, EX = North West Cape, RB = Roebuck Bay, H = hybrid dolphin. (XLSX) [file pone.0101427.s008.xlsx]

## Sheet: Sheet1
Sample	Pop	FCB4		Lobs19		Lobs21		Lobs24		Lobs9		SCA39		Tex5		FCB5		Lobs39		Lobs7.1		SCA22		SCA27		SCA9		Tex7
OHCY18	OHCY	235	269	103	103	105	105	120	124	86	86	197	197	190	190	131	133	91	91	120	140	108	108	177	177	173	178	155	155
OHCY19	OHCY	249	269	103	103	113	119	120	124	86	86	197	197	190	192	131	133	91	91	120	140	106	108	177	181	176	178	155	157
OHCY20	OHCY	235	249	103	103	105	119	120	124	86	86	195	197	192	192	131	141	91	91	144	144	106	108	177	177	173	178	155	157
OHCY21	OHCY	251	265	103	105	113	113	120	120	86	86	191	191	190	192	0	0	0	0	120	120	106	110	177	181	176	178	0	0
OHCY22	OHCY	249	249	103	103	105	119	124	124	86	86	195	197	190	192	133	133	91	91	140	144	106	110	177	177	173	176	155	155
OHCY23	OHCY	249	265	103	105	105	105	120	120	86	86	195	197	190	190	133	133	91	91	144	144	108	108	177	209	173	178	155	157
OHCY24	OHCY	249	265	103	105	105	123	120	124	86	86	197	197	190	190	133	141	91	91	120	144	106	108	177	177	172	173	155	157
OHCY25	OHCY	227	235	105	105	119	121	124	124	86	86	195	197	190	192	0	0	0	0	120	140	108	108	177	177	173	176	0	0
OHCY26	OHCY	239	249	103	103	105	121	124	124	86	86	197	197	190	190	133	133	91	91	120	144	106	108	177	181	173	176	155	155
OHCY31	OHCY	249	269	103	105	113	121	120	122	86	86	197	197	190	190	133	133	91	91	140	140	108	108	177	191	176	178	155	157
OHCY32	OHCY	239	249	103	103	105	121	120	120	86	86	191	197	190	192	133	133	91	91	120	140	106	108	169	177	178	178	157	157
OHCY35	OHCY	235	249	103	103	105	105	124	124	86	86	191	197	190	190	133	133	91	91	138	140	106	106	177	191	172	178	155	157
OHCY39	OHCY	249	251	103	105	105	113	120	124	86	86	191	197	190	192	133	139	91	91	120	140	106	106	181	191	176	178	155	157
OHCY40	OHCY	265	265	105	105	105	105	120	120	86	86	197	197	190	190	133	141	91	91	140	144	108	110	177	209	173	176	157	157
OHCY41	OHCY	249	269	103	103	105	119	124	124	86	86	197	197	190	192	133	137	91	91	120	140	108	110	177	183	173	176	155	155
OHCY42	OHCY	249	265	103	103	105	113	124	124	86	86	191	197	190	190	133	133	91	91	120	140	106	108	177	177	172	178	157	157
OHCY43	OHCY	249	249	103	103	105	119	120	124	86	86	197	197	190	190	133	133	91	91	140	140	106	110	177	191	173	178	155	157
OHCY44	OHCY	235	249	103	103	105	119	124	124	86	86	197	197	190	190	133	137	91	91	140	144	108	110	177	177	176	178	157	157
OHCY47	OHCY	249	249	105	105	119	119	124	124	86	86	191	191	190	190	131	133	91	91	120	140	106	108	177	183	176	178	155	157
OHCY48	OHCY	253	269	103	105	113	113	120	124	86	86	197	197	190	190	131	133	91	91	140	140	106	108	177	181	176	178	157	157
OHCY49	OHCY	245	249	103	105	105	121	120	124	86	86	197	197	190	190	133	133	91	91	144	144	106	108	181	209	173	178	157	157
OHCY50	OHCY	253	253	103	105	105	123	120	124	86	86	197	197	190	190	141	141	91	91	138	140	108	108	177	183	173	176	155	157
OHCY54	OHCY	243	245	105	105	121	121	120	124	86	86	195	197	192	192	133	141	91	91	140	140	108	108	177	177	172	178	157	157
OHCY56	OHCY	227	269	103	103	105	119	124	124	86	86	197	197	190	190	133	133	91	91	120	144	108	110	183	209	173	173	157	157
OHCY60	OHCY	249	265	103	105	105	121	120	124	86	86	197	197	190	192	131	133	91	91	120	120	108	110	177	209	173	176	155	157
OHCY61	OHCY	249	249	103	105	105	105	124	124	86	86	191	197	190	190	131	133	91	91	120	144	106	106	177	181	172	178	155	157
OHCY62	OHCY	245	269	103	105	105	119	120	124	86	86	197	197	190	190	137	137	91	91	120	120	108	108	177	183	172	176	155	157
OHCY63	OHCY	241	243	103	103	105	123	120	122	86	86	197	197	192	192	131	141	91	91	120	120	106	108	179	191	176	176	157	157
OHCY64	OHCY	249	251	103	105	105	113	120	124	86	86	191	197	190	190	131	133	91	91	140	144	106	110	177	183	176	176	155	157
OHCY65	OHCY	227	239	103	103	119	119	124	124	86	86	195	197	190	190	131	133	91	91	120	140	106	108	191	209	173	178	157	157
OHCY66	OHCY	239	249	103	103	105	119	120	124	86	86	197	197	190	190	133	133	91	91	140	140	106	108	177	191	176	178	157	157
OHCY71	OHCY	239	245	103	105	105	121	120	120	86	86	197	197	190	190	133	137	91	91	120	140	108	108	177	177	176	178	155	157
OHRB01	OHRB	241	251	103	103	105	121	120	124	86	86	191	197	190	192	131	133	91	91	120	120	106	110	177	177	172	176	155	157
OHRB02	OHRB	237	267	103	103	119	121	120	120	86	86	191	197	190	192	131	133	91	91	120	140	106	108	183	205	173	176	155	157
OHRB03	OHRB	249	267	103	103	105	119	120	120	86	86	197	197	190	192	139	139	91	91	120	140	108	108	169	209	176	178	157	157
OHRB04	OHRB	0	0	103	103	105	105	120	120	86	86	197	197	192	192	0	0	0	0	120	120	108	108	205	209	172	172	155	157
OHRB05	OHRB	243	265	103	105	121	123	120	120	86	86	197	197	192	192	131	133	91	91	120	144	108	110	209	209	172	178	155	157
OHRB08	OHRB	0	0	103	105	105	105	120	122	86	86	191	191	190	192	0	0	0	0	120	144	108	110	211	211	176	178	0	0
OHRB09	OHRB	241	243	103	103	105	105	120	120	86	86	197	197	190	192	131	141	91	91	120	120	108	108	205	209	172	172	157	157
OHRB10	OHRB	241	245	103	103	105	121	120	124	86	86	197	197	190	192	131	141	91	91	120	140	108	108	169	209	172	172	157	157
OHRB11	OHRB	241	243	103	105	113	113	120	120	86	86	197	197	190	192	131	141	91	91	140	140	106	108	205	211	172	176	155	157
OHRB12	OHRB	240	245	103	103	105	123	122	122	86	86	191	197	190	192	131	133	91	91	0	0	0	0	0	0	0	0	155	157
OHRB13	OHRB	240	245	103	105	105	105	120	122	86	86	191	197	190	192	133	133	91	91	120	120	108	108	169	209	172	178	157	157
OHRB14	OHRB	0	0	103	103	105	121	120	120	86	86	197	197	190	190	0	0	0	0	120	140	106	108	169	183	172	176	0	0
OHRB16	OHRB	245	249	105	105	105	121	120	120	86	86	195	197	192	192	0	0	0	0	120	120	108	108	185	205	176	176	0	0
OHRB19	OHRB	245	267	103	105	105	121	120	120	86	86	197	197	190	190	131	131	91	91	120	120	106	108	177	179	176	176	155	155
OHRB21	OHRB	243	245	105	105	113	121	120	120	86	86	197	197	192	192	131	133	91	91	140	140	110	110	209	209	176	178	157	157
OHRB22	OHRB	245	267	103	105	105	119	120	120	86	86	191	197	192	192	131	133	91	91	120	144	106	108	179	209	172	176	155	157
OHRB23	OHRB	241	243	103	103	105	113	120	124	86	86	197	197	190	192	0	0	0	0	120	140	106	108	191	209	172	176	0	0
OHRB24	OHRB	241	245	105	105	105	121	120	120	86	86	197	197	190	192	131	131	91	91	140	140	106	110	169	179	176	176	155	157
OHRB26	OHRB	245	267	103	105	105	119	120	120	86	86	195	197	192	192	133	141	91	91	0	0	0	0	0	0	0	0	155	155
OHRB28	OHRB	0	0	103	103	105	121	120	120	86	86	191	197	192	192	131	133	91	91	120	152	108	108	189	189	0	0	155	157
OHRB30	OHRB	241	243	103	105	105	121	120	120	86	86	197	197	190	190	131	133	91	91	120	120	106	108	177	185	172	178	157	157
OHRB31	OHRB	265	267	103	103	119	121	120	120	86	86	191	197	190	192	131	139	91	91	140	144	108	108	177	209	172	176	155	157
OHRB32	OHRB	241	267	103	105	105	113	124	124	86	86	197	197	192	192	0	0	0	0	120	140	108	108	209	209	172	176	0	0
OHRB33	OHRB	243	265	103	105	105	105	120	122	86	86	191	191	190	192	133	133	91	91	120	144	110	110	205	211	176	178	155	157
OHRB35	OHRB	241	245	103	105	113	121	120	122	86	86	191	191	192	192	131	141	91	91	120	120	108	110	169	177	173	176	155	155
SCCY28	SCCY	221	227	139	147	115	115	116	132	112	112	199	201	192	192	123	127	93	95	146	146	110	116	187	187	198	206	169	169
SCCY36	SCCY	0	0	137	139	115	115	116	127	112	112	201	201	192	192	123	127	95	99	136	136	110	110	187	189	206	212	169	169
SCCY37	SCCY	219	227	141	147	115	115	118	132	112	112	197	201	192	192	123	127	93	99	146	150	108	110	187	187	206	206	163	169
SCCY55	SCCY	217	219	137	141	111	115	116	118	104	112	201	201	192	192	123	127	93	95	146	148	114	116	187	189	210	216	163	169
SCCY57	SCCY	219	225	141	147	115	115	118	130	112	112	195	199	192	192	123	127	93	95	146	148	116	122	187	187	204	206	169	169
SCDA01	SCDA	219	227	141	141	115	115	116	130	112	112	201	201	192	192	123	123	93	93	136	148	118	122	189	189	210	210	169	169
SCDA02	SCDA	219	219	141	141	115	115	116	116	112	112	197	197	192	192	0	0	0	0	152	152	108	108	189	189	206	210	0	0
SCDA03	SCDA	219	219	141	141	115	115	116	116	112	112	197	199	192	192	123	123	93	95	136	150	118	122	189	189	180	206	169	169
SCDA04	SCDA	217	219	141	145	115	115	116	130	112	112	197	201	192	192	123	123	93	93	136	152	108	118	189	191	182	182	167	169
SCDA05	SCDA	217	227	143	145	115	115	116	130	112	112	197	201	192	192	0	0	0	0	148	148	108	108	189	189	206	210	0	0
SCDA06	SCDA	222	227	139	141	115	115	116	130	112	112	197	201	192	192	123	123	93	93	136	136	122	122	189	189	182	210	169	169
SCDA07	SCDA	0	0	139	141	115	117	116	116	112	112	197	201	192	192	0	0	0	0	136	150	108	108	189	189	182	182	0	0
SCDA08	SCDA	217	219	139	141	115	115	116	116	112	112	201	201	192	192	0	0	0	0	136	152	108	108	189	189	182	210	0	0
SCDA09	SCDA	217	219	137	141	115	115	116	130	112	112	197	201	192	192	0	0	0	0	152	152	122	122	189	189	180	182	0	0
SCDA10	SCDA	219	219	141	149	115	115	116	130	112	112	197	201	192	192	123	123	93	95	152	152	122	122	189	189	206	206	167	169
SCDA11	SCDA	219	219	141	141	115	115	116	130	112	112	197	201	192	192	123	123	93	93	136	136	108	122	189	189	182	182	169	169
SCDA12	SCDA	219	227	139	141	115	115	116	116	112	112	197	197	192	192	123	123	93	93	148	152	108	118	189	189	182	182	169	169
SCDA13	SCDA	219	221	141	149	115	117	116	130	112	112	197	201	192	192	0	0	0	0	148	148	108	122	189	189	182	204	0	0
SCDA14	SCDA	219	222	141	145	115	115	116	130	112	112	197	201	192	192	123	123	93	95	152	152	120	122	189	189	210	210	169	169
SCDA15	SCDA	219	219	137	145	115	115	116	130	112	112	201	201	192	192	123	123	93	93	152	154	108	122	189	189	182	206	169	169
SCDA17	SCDA	219	219	139	145	115	115	116	116	112	112	197	201	192	192	123	123	93	93	136	152	108	108	189	189	182	182	169	169
SCDA18	SCDA	219	222	141	143	115	115	116	116	112	112	197	197	192	192	0	0	0	0	136	136	114	122	189	191	180	182	169	169
SCDA19	SCDA	219	219	141	141	115	115	116	130	112	112	197	201	192	192	123	123	93	95	136	148	122	122	189	189	180	182	169	169
SCDA20	SCDA	219	227	137	141	115	115	130	136	112	112	197	201	192	192	123	123	93	93	136	152	108	122	187	189	182	210	169	169
SCEX01	SCEX	219	219	141	149	115	115	132	136	0	0	197	201	192	192	123	123	93	93	136	152	116	116	189	191	202	202	167	169
SCEX02	SCEX	219	219	141	143	115	115	116	136	112	112	201	201	192	192	123	123	93	93	152	152	108	108	189	189	206	206	169	169
SCEX04	SCEX	219	219	141	141	115	117	116	130	112	112	197	197	192	192	123	123	93	93	148	148	116	122	189	189	182	202	169	169
SCEX06	SCEX	219	219	141	143	115	115	130	136	112	112	201	201	192	192	123	123	93	93	148	152	108	114	189	189	182	196	169	169
SCEX07	SCEX	0	0	147	149	115	115	130	130	0	0	201	201	192	192	123	127	0	0	0	0	114	122	189	189	182	182	169	169
SCEX08	SCEX	219	227	139	149	115	115	130	132	112	112	197	197	192	192	123	123	93	93	152	152	108	122	189	189	182	182	169	169
SCEX09	SCEX	219	219	141	141	115	117	127	136	112	112	197	197	192	192	123	123	93	95	136	152	108	122	189	189	196	206	169	169
SCEX10	SCEX	219	219	141	149	115	115	132	136	112	112	197	201	192	192	123	123	93	95	136	152	116	116	189	191	202	202	169	169
SCEX11	SCEX	0	0	0	0	115	115	116	130	0	0	197	199	192	192	123	123	0	0	0	0	108	108	189	189	182	182	169	169
SCEX12	SCEX	219	219	139	139	115	115	130	130	112	112	197	199	192	192	123	123	93	93	152	152	108	122	189	189	182	210	169	169
SCEX13	SCEX	219	219	141	147	115	115	132	132	0	0	197	201	192	192	123	123	93	93	152	152	0	0	191	191	182	202	169	169
SCEX14	SCEX	0	0	141	141	115	115	116	116	0	0	197	201	192	192	0	0	0	0	152	152	108	122	189	189	196	204	169	169
SCEX15	SCEX	219	219	141	147	115	115	130	130	112	112	201	201	192	192	123	123	93	93	152	152	114	122	189	189	196	196	169	169
SCEX16	SCEX	219	227	139	145	115	115	116	130	112	112	197	197	192	192	123	123	93	93	136	152	108	122	187	189	182	198	169	169
SCEX18	SCEX	219	219	143	147	115	115	130	136	112	112	197	201	192	192	123	123	93	93	148	152	108	114	189	189	196	206	169	169
SCEX21	SCEX	219	219	141	149	115	115	116	132	0	0	197	197	192	192	123	123	93	95	152	152	108	108	189	189	182	182	169	169
SCEX22	SCEX	219	227	141	141	115	115	116	130	112	112	197	201	192	192	123	123	93	93	152	152	114	120	189	189	182	206	169	169
SCEX23	SCEX	219	219	141	149	115	115	136	136	112	112	201	201	192	192	123	123	93	95	152	152	108	108	189	189	206	212	169	169
HCY38	CY hybrid	221	235	103	139	105	115	120	124	86	86	197	201	192	192	127	141	91	99	120	150	110	112	181	187	176	210	155	169
